# Supplementary material for: Primary Care Review of Actinic Keratosis and Its Therapeutic Options: A Global Perspective
Source: PubMed Central journal article supplement — Dermatol Ther (Heidelb). 2015 Feb 3;5(1):19–35. doi: 10.1007/s13555-015-0070-9 (PMC4374063; doi:10.1007/s13555-015-0070-9), 2015-02-03
Supplement: 13555_2015_70_MOESM1_ESM.pdf [file 13555_2015_70_MOESM1_ESM.pdf]

- Actinic keratosis (AK) is a common skin condition that has the potential to progress to non-melanoma skin cancers.
- General awareness of AK among primary care physicians is low and no standard therapeutic strategy exists. A variety of factors determine the treatment option that is used including: experience of physician, pathology of the lesion, and patient characteristics.
- Primary care physicians are often the first to see AK in their patients and are well placed to educate the public and raise awareness.
- It is important that the primary care physicians are up to date with their education and knowledge of AK, to ensure that the optimal treatment option is used.
- We examine the therapeutic options and management of AK globally, and particularly in Australia, Canada, and the United Kingdom.

This summary slide represents the opinions of the authors. Article processing charges were funded by LEO Pharma A/S. Medical writing services were provided by Isabelle Leach and Rasila Vaghjani of iMed Comms, Macclesfield, UK, and were funded by LEO Pharma A/S. For a full list of acknowledgments and conflicts of interest for all authors of this article, please see the full text online. Copyright © The Author(s) 2015. Creative Commons Attribution Noncommercial License (CC BY-NC).
